# Supplementary material
Source: PubMed Central journal article supplement (PMC2518911)
Supplement: blood-2007-12-127449_1.pdf [file blood-2007-12-127449_1.pdf]

**Mean  $\pm$  SD % donor chimerism among  
chimeric mice**

| <b># in group</b> | <b>Anti-CD8 mAb</b> | <b>Recipients</b>           | <b># of chimeras</b> | <b>Mac1<sup>+</sup> Cells</b> | <b>B Cells</b>   | <b>CD4<sup>+</sup> Cells</b> |
|-------------------|---------------------|-----------------------------|----------------------|-------------------------------|------------------|------------------------------|
| 7                 | Yes                 | C57BL/6                     | 7                    | 60.06 $\pm$ 20.69             | 48 $\pm$ 17.07   | 31.23 $\pm$ 12.27            |
| 8                 | Yes                 | C57BL/6 PD-1 <sup>-/-</sup> | 8                    | 33.75 $\pm$ 9.27              | 51.86 $\pm$ 4.16 | 26.33 $\pm$ 4.63             |
| 7                 | No                  | C57BL/6                     | 6                    | 60.62 $\pm$ 10.15             | 59.42 $\pm$ 7.67 | 32.47 $\pm$ 4.49             |
| 5                 | No                  | C57BL/6 PD-1 <sup>-/-</sup> | 0                    | 0                             | 0                | 0                            |
