# Supplementary material
Source: PubMed Central journal article supplement (PMC2518911)
Supplement: blood-2007-12-127449_2.pdf [file blood-2007-12-127449_2.pdf]

---

*Mean ± SD % donor chimerism among chimeric mice*

---

| <b># in group</b> | <b>Anti-CD8 mAb</b> | <b>Anti PD-1 and anti-PD-L1 mAb</b> | <b># of chimeras</b> | <b>Mac1+ Cells</b> | <b>B Cells</b> | <b>CD4+ Cells</b> |
|-------------------|---------------------|-------------------------------------|----------------------|--------------------|----------------|-------------------|
| 7                 | Yes                 | No                                  | 7                    | 76.8 ± 11.69       | 55.55 ± 22.09  | 31.10 ± 5.33      |
| 8                 | Yes                 | Yes                                 | 8                    | 61.15 ± 24.17      | 62.17 ± 11.96  | 38.04 ± 9.08      |
| 7                 | No                  | No                                  | 6                    | 59.02 ± 17.34      | 59.47 ± 11.31  | 36.03 ± 5.92      |
| 8                 | No                  | Yes                                 | 1                    | 64.19              | 46.33          | 9.10              |
| 8                 | No                  | Anti-PD-L1 mAb alone                | 1                    | 6.3                | 7.57           | 17.78             |
| 5                 | No                  | Anti-PD1 mAb alone                  | 1                    | 5.82               | 30.16          | 14.88             |

---
